# Supplementary material for: Decrease of Let-7f in Low-Dose Metronomic Paclitaxel Chemotherapy Contributed to Upregulation of Thrombospondin-1 in Breast Cancer
Source: PubMed Central journal article supplement — Int J Biol Sci. 2015 Jan 1;11(1):48–58. doi: 10.7150/ijbs.9969 (PMC4278254; doi:10.7150/ijbs.9969), 2015-01-01
Supplement: ijbsv11p0048s1.pdf [file ijbsv11p0048s1.pdf]

Supplementary Figure 1.

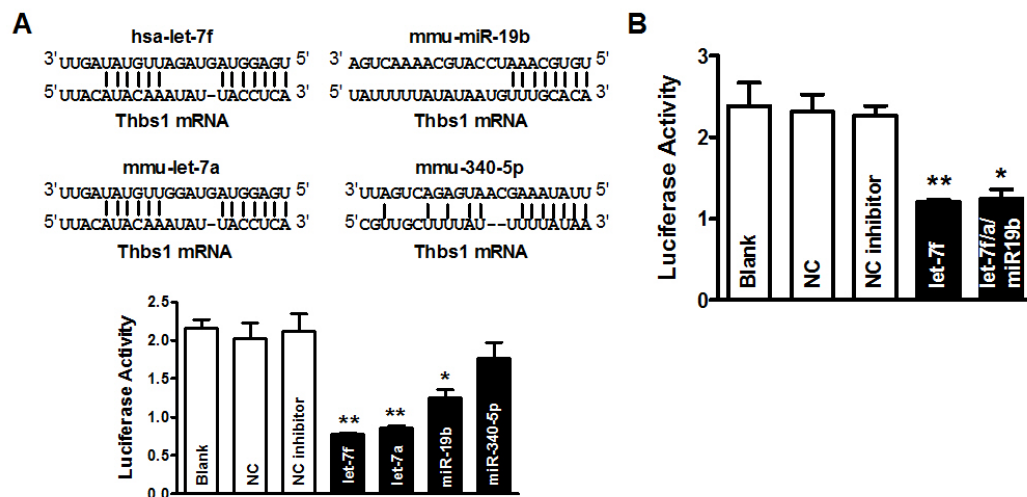

**Supplementary Figure 1. The effects of let-7a and miR-19b on the expression of THBS1.** A, Luciferase assay was used to study post-transcriptional inhibition of *THBS1* (gene encoding TSP-1 protein). HEK293T cells were transfected with miR-let-7f, miR-let-7a, miR-19b, miR-340-5p or a scrambled miRNA (NC) and its inhibitor (NC inhibitor) as negative control by Lipofectamine™ RNAiMAX. Blank group was treated with Lipofectamine™ RNAiMAX alone. \*  $P < 0.05$  vs NC, \*\*  $P < 0.01$  vs NC;  $n = 6$  independent batches of cells for each group. B, The effects of miR-let-7f alone, let-7a plus miR-19b, or a scrambled miRNA (NC) and its inhibitor (NC inhibitor) as negative control on the luciferase reporter activity in HEK293T cells. \*  $P < 0.05$  vs NC, \*\*  $P < 0.01$  vs NC;  $n = 6$  independent batches of cells for each group.
